# Supplementary material
Source: ML conference proceedings conference paper supplement (https://proceedings.neurips.cc/paper_files/paper/2023/hash/f95606d8e870020085990d9650b4f2a1-Abstract.html)
Supplement: Supplementary file 1 [file f95606d8e870020085990d9650b4f2a1-Supplemental-Conference.pdf]

# Cascading Bandits: Optimizing Recommendation Frequency in Delayed Feedback Environments

## Supplementary Material

### 1 Notations

- $\kappa$  : index function,  $\kappa(i) = j$  if and only if  $S_i = \{j\}$
- $\vartheta$  : inverse function of  $\kappa$ , i.e.,  $\vartheta(i) = j$  if and only if  $S_j = \{i\}$
- $\mathbf{v} = (v_1, v_2, \dots, v_N)$ : attraction probabilities of messages
- $\mathbf{R} = (R_1, R_2, \dots, R_N)$ : reward of messages
- $D$ : re-targeting window
- $f(m) = \lceil m/D \rceil$ : frequency when the total number of messages is  $m$
- $q(m)$  : the probability of staying in the system after skipping a message (i.e., no click) for users with dissemination frequency  $f(m)$
- $\mathbf{q} = (q(1), q(2), \dots, q(M))$ : a vector of  $q$  functions
- $w_i(m)$ : the examine probability of message  $i$  when the total number of messages is  $m$
- $U(\mathbf{S}, \mathbf{v}, q)$ : the total payoff for sequence  $\mathbf{S}$  when parameters are  $\mathbf{v}$  and  $q$
- $\gamma_i$ : the characteristic parameter of message  $i$ ,  $\gamma_i = \frac{v_i R_i}{1 - v_i(1 - q(m))}$
- $T_i(t)$ : the total number of feedback (i.e., sum of clicks and no-clicks) received for message  $i$  by time  $t$
- $c_i(t)$ : the number of clicks for message  $i$  by time  $t$
- $\tilde{T}_m(t)$ : the total number of no-clicks from users with dissemination frequency  $f(m)$
- $b_m(t)$ : the number of abandoned users with frequency  $f(m)$  by time  $t$
- $n_m(t)$ : equals  $\tilde{T}_m(t) - b_m(t)$
- $\mathcal{E}_r$  :  $t \in \mathcal{E}_r$  if the agent sends message to user  $r$  at time  $t$
- $\epsilon_m(t)$  : the set of time stamps that a message with frequency  $f(m)$  is sent
- $\rho_r^k$ : the time stamps when the  $k^{\text{th}}$  message is sent to user  $r$
- $m_r$  : the number of total messages for user  $r$  and the corresponding frequency is  $f(m_r)$

- $e_{t,k}^r$  : the index of the  $k^{\text{th}}$  message sent to user  $r$  at time  $t$
- $O_r^t$ : the messages which have been sent to user  $r$  by time  $t$
- $z_{i,t}$ : the total number of times that message  $i$  is sent to users at time  $t$
- $A_i(t)$ : the set of time stamps of sending message  $i$  by time  $t$
- $\mathbf{w}_{r,i}$ : the features of message  $i$  at time  $r$
- $\mathbf{x}_r$  : the features of user  $r$
- $\alpha_m$  : coefficients related to abandonment behavior when the frequency is  $f(m)$
- $\beta$ : coefficients related to the attraction probability of messages
- $Y_{r,i}$ :  $Y_{r,i} = 1$  if user  $r$  clicks on the message  $i$ , and  $Y_{r,i} = 0$  otherwise
- $\hat{Y}_{r,j}$ :  $\hat{Y}_{r,j} = 1$  if user  $r$  remains in the system after she does not click on the  $j^{\text{th}}$  message in a list, while  $\hat{Y}_{r,j} = 0$  otherwise

## 2 Proofs

Throughout the paper, we will use coupling to prove several key results. For more information on this, we refer the reader to Section 2.2 in [1].

**Theorem 2.2** *In the optimal sequence  $\mathbf{S}^*$ , the characteristic parameter of messages  $\gamma = \frac{vR}{1-v(1-q(m))}$  are sorted in a descending order.*

**Proof.** We prove this theorem by contradiction. Assume the optimal sequence

$$\mathbf{S}^* = (S_1, S_2, \dots, S_i, S_{i+1}, \dots, S_m),$$

with  $\gamma_{\kappa(i)} < \gamma_{\kappa(i+1)}$ , which implies  $v_{\kappa(i)}R_{\kappa(i)}(1 - v_{\kappa(i+1)}(1 - q(m))) < v_{\kappa(i+1)}R_{\kappa(i+1)}(1 - v_{\kappa(i)}(1 - q(m)))$ . The expected reward

$$\begin{aligned} & E[U(\mathbf{S}^*, \mathbf{v}, \mathbf{R}, q(m))] \\ &= \sum_{k=1}^m [v_{\kappa(k)}R_{\kappa(k)} \prod_{s=1}^{k-1} q(m)(1 - v_{\kappa(s)})] \\ &= \sum_{1 \leq k \leq m, k \neq i, i+1} [v_{\kappa(k)}R_{\kappa(k)} \prod_{s=1}^{k-1} q(m)(1 - v_{\kappa(s)})] + v_{\kappa(i)}R_{\kappa(i)} \prod_{s=1}^{i-1} q(m)(1 - v_{\kappa(s)}) \\ &\quad + v_{\kappa(i+1)}R_{\kappa(i+1)} \prod_{s=1}^{i-1} q(m)(1 - v_{\kappa(s)})((1 - v_{\kappa(i)})q(m)). \end{aligned}$$

Consider the sequence  $\mathbf{S}' = (S_1, S_2, \dots, S_{i+1}, S_i, \dots, S_m)$ . Similarly we have

$$\begin{aligned} & E[U(\mathbf{S}', \mathbf{v}, \mathbf{R}, q(m))] \\ &= \sum_{1 \leq k \leq m, k \neq i, i+1} [v_{\kappa(k)} R_{\kappa(k)} \prod_{s=1}^{k-1} q(m)(1 - v_{\kappa(s)})] + v_{\kappa(i+1)} R_{\kappa(i+1)} \prod_{s=1}^{i-1} q(m)(1 - v_{\kappa(s)}) \\ & \quad + v_{\kappa(i)} R_{\kappa(i)} \prod_{s=1}^{i-1} q(m)(1 - v_{\kappa(s)})((1 - v_{\kappa(i+1)})q(m)). \end{aligned}$$

Thus,

$$\begin{aligned} & E[U(\mathbf{S}^*, \mathbf{v}, \mathbf{R}, q(m))] - E[U(\mathbf{S}', \mathbf{v}, \mathbf{R}, q(m))] \\ &= \prod_{s=1}^{i-1} ((1 - v_{\kappa(s)})q(m)) \\ & \quad \cdot [v_{\kappa(i)} R_{\kappa(i)} + v_{\kappa(i+1)} R_{\kappa(i+1)} ((1 - v_{\kappa(i)})q(m)) - v_{\kappa(i+1)} R_{\kappa(i+1)} - v_{\kappa(i)} R_{\kappa(i)} ((1 - v_{\kappa(i)})q(m))] \\ &< 0. \end{aligned}$$

It contradicts with the assumption that  $\mathbf{S}^*$  is the optimal sequence. Therefore, the characteristic parameter of messages  $\gamma = \frac{vR}{1-v(1-q(m))}$  are sorted in a descending order.  $\square$

**Lemma 3.1** For any  $t$ , we have  $P\left(v_{i,t}^{UCB} - \sqrt{8 \frac{\log t}{T_i(t)}} < v_i < v_{i,t}^{UCB}\right) \geq 1 - \frac{2}{t^4}$  for all  $i \in X$  and  $P\left(q_t^{UCB}(m) - \sqrt{8 \frac{\log t}{T_m(t)}} < q(m) < q_t^{UCB}(m)\right) \geq 1 - \frac{2}{t^4}$  for all  $1 \leq m \leq M$ .

**Proof.** Firstly, it is easy to verify that  $\hat{v}_{i,t}$  and  $\hat{q}_t(m)$  are unbiased estimators. Applying Hoeffding's inequality, we have

$$\begin{aligned} & P\left(v_{i,t}^{UCB} < v_i\right) + P\left(v_{i,t}^{UCB} > v_i + 2\sqrt{2 \log t / T_i(t)}\right) \\ &= P\left(\hat{v}_{i,t} + \sqrt{2 \log t / T_i(t)} < v_i\right) + P\left(\hat{v}_{i,t} > v_i + \sqrt{2 \log t / T_i(t)}\right) \\ &= P\left(|\hat{v}_{i,t} - v_i| > \sqrt{2 \log t / T_i(t)}\right) \leq 2 \exp(-4 \log t) = \frac{2}{t^4}. \end{aligned}$$

It implies that

$$P\left(v_{i,t}^{UCB} - \sqrt{\frac{8 \log t}{T_i(t)}} < v_i < v_{i,t}^{UCB}\right) \geq 1 - \frac{2}{t^4}.$$

Similarly, we have

$$\begin{aligned} & P\left(q_t^{UCB}(m) < q(m)\right) + P\left(q_t^{UCB}(m) > q(m) + 2\sqrt{2 \log t / \tilde{T}_m(t)}\right) \\ &= P\left(\hat{q}_t(m) + \sqrt{2 \log t / \tilde{T}_m(t)} < q(m)\right) + P\left(\hat{q}_t(m) > q(m) + \sqrt{2 \log t / \tilde{T}_m(t)}\right) \\ &= P\left(|\hat{q}_t(m) - q(m)| > \sqrt{2 \log t / \tilde{T}_m(t)}\right) \leq 2 \exp(-4 \log(t)) = \frac{2}{t^4}, \end{aligned}$$

which implies that

$$P\left(q_t^{UCB}(m) - \sqrt{\frac{8 \log t}{\hat{T}_m(t)}} < q(m) < q_t^{UCB}(m)\right) \geq 1 - \frac{2}{t^4}.$$

□

**Lemma 3.2** *Assume  $\mathbf{S}^*$  is the optimal sequence of messages with corresponding total message  $m^*$ . Under the condition that  $0 \leq \mathbf{v} \leq \mathbf{v}^{UCB}$  and  $0 \leq q(m^*) \leq q^{UCB}(m^*)$ , we have*

$$E[U(\mathbf{S}^*, \mathbf{v}^{UCB}, \mathbf{R}, q^{UCB}(m^*))] \geq E[U(\mathbf{S}^*, \mathbf{v}, \mathbf{R}, q(m^*))].$$

**Proof.** This Lemma describes the monotonic increasing property of total payoff with respect to both  $\mathbf{v}$  and  $q(m^*)$ . First, we couple the recommending process of  $(\mathbf{S}^*, \mathbf{v}, \mathbf{R}, q^{UCB}(m^*))$  (call this process targets on user 1) and  $(\mathbf{S}^*, \mathbf{v}, \mathbf{R}, q(m^*))$  (call this process targets on user 2). Generate  $M$  independent random variables  $u_j$  for  $j = 1, \dots, M$  which all follow the uniform distribution on  $[0,1]$ . The event  $u_j < q(m^*)$  means that both users will stay after observing the  $j^{th}$  unsatisfying message, while the event  $u_j > q^{UCB}(m^*)$  means that both users will leave.  $q(m^*) \leq u_j \leq q^{UCB}(m^*)$  means that user 1 will stay and user 2 will leave, in which case the coupling breaks. In all cases, recommending the sequence  $\mathbf{S}^*$  with parameters  $(\mathbf{v}, q^{UCB}(m^*))$  will have at least the same payoff as recommending the sequence  $\mathbf{S}$  with parameter  $(\mathbf{v}, q(m^*))$ . Therefore, the increasing property of total payoff with respect to  $q(m^*)$  has been proven.

Then consider two identical recommending lists with the attraction probability of only one message is different. Assume the  $k$ -th message has  $v_{k1} > v_{k2}$ , and  $v_{i1} = v_{i2}$ ,  $\forall i \neq k$ . Denote the expected return of the two lists as  $E[U_1]$  and  $E[U_2]$ , respectively. We have

$$\begin{aligned} & E[U_1] - E[U_2] \\ &= (1 - v_{bef})(v_{k1}R_k + (1 - v_{k1})R_{after} - v_{k2}R_k - (1 - v_{k2})R_{after}) \\ &= (1 - v_{bef})(v_{k1} - v_{k2})(R_k - R_{after}) \\ &\geq 0, \end{aligned}$$

with  $R_{bef}, R_{after}$  means the expected return of all the messages before/after the  $k$ -th message respectively. The last inequality holds because  $R_k \geq R_{after}$ , otherwise removing the  $k$ -th message will give a higher return  $R_{after}$ . Since  $k$  can be any message, we have proven the increasing property of total payoff with respect to  $\mathbf{v}$ . □

**Lemma 3.3** *When all messages have identical reward, for  $t \in \mathcal{E}_r$  and any  $q' \in (0, 1)$ , we have*

$$\begin{aligned} & E_\pi[E[(U(k, \mathbf{v}, \mathbf{R}, q') - U(e_{t,k}^r, \mathbf{v}, \mathbf{R}, q'))\mathbf{1}(\mathbf{v}_t^{UCB} \geq \mathbf{v})|\mathcal{F}_{t-1}]] \\ & \leq E_\pi\left[E\left[\left(v_{e_{t,k}^r, t}^{UCB} - v_{e_{t,k}^r, k}\right)\mathbf{1}(\mathbf{v}_t^{UCB} \geq \mathbf{v})|\mathcal{F}_{t-1}\right]\right], \end{aligned}$$

where  $e_{t,k}^r$  is the index of the  $k^{th}$  message sent to user  $r$  at time  $t$ .

**Proof.** Given the assumption,  $v_1 \geq v_2 \geq \dots \geq v_N$  in the optimal list. If  $e_{t,k}^r \leq k$ , the conclusion holds because  $v_{e_{t,k}^r} \geq v_k$ , which implies that  $E[U(e_{t,k}^r, \mathbf{v}, \mathbf{R}, q)] \geq E[U(k, \mathbf{v}, \mathbf{R}, q)]$ . Otherwise, if  $e_{t,k}^r > k$ , then  $v_{e_{t,k}^r} \leq v_k$ . Note that  $v_{e_{t,k}^r}^{UCB}$  is at least the  $k^{\text{th}}$  largest among  $\mathbf{v}_t^{UCB}$ , otherwise  $e_{t,k}^r$  will not be chosen. With  $\mathbf{v}_t^{UCB} \geq \mathbf{v}$ , we have  $v_k \leq v_{e_{t,k}^r}^{UCB}$  because the  $k^{\text{th}}$  largest value in sequence  $\mathbf{v}_t^{UCB}$  is larger than or equal to the  $k^{\text{th}}$  largest value in  $\mathbf{v}$ . Therefore, we have  $v_{e_{t,k}^r} \leq v_k \leq v_{e_{t,k}^r}^{UCB}$ . It implies that  $v_k - v_{e_{t,k}^r} \leq v_{e_{t,k}^r}^{UCB} - v_{e_{t,k}^r}$ . Thus, we have reached the desired result.  $\square$

**Theorem 3.4** *The expected regret of Algorithm 2 is bounded above by*

$$\text{Reg}(T) \leq C_1(N + M^2)\sqrt{T \log T} + C_2 N \tau_{\max}$$

for some constants  $C_1$  and  $C_2$ .

**Proof.** Firstly, we show that  $\text{Reg}(T) \leq C \text{Reg}_{\text{iden}}(T)$ , where  $\text{Reg}_{\text{iden}}(T)$  denotes the regret of Algorithm 2 with messages with identical reward. Define  $R_{\max}$  to be the maximum in the actual list, and  $S^*$  to be the optimal list. Thus,  $\text{Reg}(T) \leq R_{\max} U_{\max}^* \leq R_{\max} C'(U^* - U^S) = C \text{Reg}_{\text{iden}}(T)$ . The second inequality holds because  $U_{\max}^*$  can be bounded above and  $C'$  can always be fixed selected in a specific problem.

Then we only need to discuss the identified-reward scenario. We omit the notation  $\mathbf{R}$  in the proof below within this scenario. Define the optimal length of message is  $m^*$  with the corresponding optimal staying probability  $q_* = q(m^*)$ . Assume the sequence offered to user  $r$  (entering at time  $r$ ) is  $\mathbf{S}^r$  with total message number  $m_r$ . We want to quantify the difference between the expected profit gained from  $\mathbf{S}^r$  and  $\mathbf{S}^*$  where  $\mathbf{S}^* = (1, 2, \dots, m^*)$ . First we note that

$$\begin{aligned} & E_\pi[U(\mathbf{S}^*, \mathbf{v}, q_*)] - E_\pi[U(\mathbf{S}^r, \mathbf{v}, q(m_r))] \\ &= E_\pi[U(\mathbf{S}^*, \mathbf{v}, q_*)] - E_\pi[U(\mathbf{S}^*, \mathbf{v}, q(m_r))] + E_\pi[U(\mathbf{S}^*, \mathbf{v}, q(m_r))] - E_\pi[U(\mathbf{S}^r, \mathbf{v}, q(m_r))]. \end{aligned} \quad (1)$$

Let  $\mathbf{S}_0^r$  denote the recommendation sequence for user  $r$  when she enters the system, i.e.,  $\mathbf{S}_0^r$  is the optimal sequence given  $\mathbf{v}_{r-1}^{UCB}$  and  $\mathbf{q}_{r-1}^{UCB}$ . Note that this list may change at a later time when more information becomes available. Define events

$$B_{i,t} = \left\{ v_{i,t}^{UCB} - \sqrt{8 \frac{\log t}{T_i(t)}} < v_i < v_{i,t}^{UCB} \right\} \text{ and } E_{m,t} = \left\{ q_t^{UCB}(m) - \sqrt{8 \frac{\log t}{\hat{T}_m(t)}} < q(m) < q_t^{UCB}(m) \right\}.$$

Define  $H_t = \bigcap_{i \in X} B_{i,t} \bigcap_{1 \leq m \leq M} E_{m,t}$  and  $J_t = \bigcap_{i \in X} B_{i,t}$ . On event  $H_t$ , firstly we have

$$\begin{aligned} E_\pi[U(\mathbf{S}_0^r, \mathbf{v}, q(m_r))] &\leq E_\pi[U(\mathbf{S}^*, \mathbf{v}, q(m_r))] \leq E_\pi[R(\mathbf{S}^*, \mathbf{v}, q(m^*))] \\ &\leq E_\pi[U(\mathbf{S}^*, \mathbf{v}_{r-1}^{UCB}, q_{r-1}^{UCB}(m^*))] \leq E_\pi[U(\mathbf{S}_0^r, \mathbf{v}_{r-1}^{UCB}, q_{r-1}^{UCB}(m_r))], \end{aligned}$$

where the first inequality holds because  $\mathbf{S}^*$  is the optimal order (arranged from the highest attraction probability to the lowest), the second inequality holds because  $q(m^*)$  is the staying probability corresponding to the optimal frequency  $m^*$ , the third inequality holds because of Lemma 3.2, and the fourth inequality holds because  $\mathbf{S}_0^r$  is the optimal sequence given values  $\mathbf{v}_{r-1}^{UCB}$  and  $\mathbf{q}_{r-1}^{UCB}$ . Thus we have

$$E_\pi[(U(\mathbf{S}^*, \mathbf{v}, q(m^*)) - U(\mathbf{S}^r, \mathbf{v}, q(m_r)))1(H_{r-1})]$$

$$\leq E_\pi[(U(\mathbf{S}_0^r, \mathbf{v}_{r-1}^{UCB}, q_{r-1}^{UCB}(m_r)) - U(\mathbf{S}_0^r, \mathbf{v}, q(m_r)))1(H_{r-1})].$$

To get the difference between the expected payoff of two items above, we use coupling to bound the difference between the recommending process  $\mathbf{S}_0^r$  with  $q_{r-1}^{UCB}(m_r), \mathbf{v}_{r-1}^{UCB}$  (call this process targets on user 1) and  $\mathbf{S}_0^r$  with  $q(m_r), \mathbf{v}$  (call this process targets on user 2). For the  $k^{th}$  recommendation where  $k$  ranges from 1 to  $m_r$ , generate two independent uniform random variables  $w_1 \sim unif[0, 1]$  and  $w_2 \sim unif[0, 1]$ . The event  $w_1 \leq v_{\mathbf{S}_0^r(k)}$  means that both click on the  $k^{th}$  message. The event  $w_1 \geq v_{\mathbf{S}_0^r(k), r-1}^{UCB}$  means that both do not click on the  $k^{th}$  message. If  $v_{\mathbf{S}_0^r(k)} \leq w_1 \leq v_{\mathbf{S}_0^r(k), r-1}^{UCB}$ , the coupling process breaks, i.e., user 1 clicks on the  $k^{th}$  message but user 2 does not click on the message. The event  $w_2 \leq q(m_r)$  denotes that both stay in the system. If  $w_2 \geq q_{r-1}^{UCB}(m_r)$ , both exit the system. If  $q(m_r) < w_2 < q_{r-1}^{UCB}(m_r)$  and  $w_1 \geq v_{\mathbf{S}_0^r(k), r-1}^{UCB}$ , user 1 chooses to stay in the system and user 2 exits the system, so the coupling process breaks. Let  $\hat{\tau}_r$  denote the stopping time that the coupling process breaks. Also define  $\varepsilon_m$  as the set of time stamps that a message with frequency  $f(m)$  is sent to user and  $\rho_r^k$  as the time to offer the  $k^{th}$  message to user  $r$ . Thus we have

$$\begin{aligned} & E_\pi [E[(U(\mathbf{S}_0^r, \mathbf{v}_{r-1}^{UCB}, q_{r-1}^{UCB}(m_r)) - U(\mathbf{S}_0^r, \mathbf{v}, q(m_r)))1(H_{r-1})|\mathcal{F}_{r-1}]] \\ & \leq E_\pi \left[ E \left[ \sum_{k=1}^{m_r} 1(\hat{\tau}_r = k)1(H_{r-1})|\mathcal{F}_{r-1} \right] \right] \\ & \leq E_\pi \left[ E \left[ \sum_{k=1}^{m_r} \sum_{i=1}^N 1(i \in \mathbf{S}_0^r(k)) (v_{i, r-1}^{UCB} - v_i) 1(H_{r-1})|\mathcal{F}_{r-1} \right] \right] \\ & \quad + E_\pi \left[ E \left[ \sum_{k=1}^{m_r} 1(\rho_r^k \in \varepsilon_{m_r}) (q_{r-1}^{UCB}(m_r) - q(m_r)) 1(H_{r-1})|\mathcal{F}_{r-1} \right] \right] \\ & \leq E_\pi \left[ \sum_{k=1}^{m_r} \sum_{i=1}^N 1(i \in \mathbf{S}_0^r(k)) \sqrt{8 \frac{\log(r-1)}{T_i(r-1)}} \right] + E_\pi \left[ \sum_{k=1}^{m_r} 1(\rho_r^k \in \varepsilon_{m_r}) \sqrt{8 \frac{\log(r-1)}{n_{m_r}(r-1)}} \right]. \end{aligned}$$

Summing over all the time steps, we have

$$\begin{aligned} & \sum_{r=1}^T E_\pi [E[(U(\mathbf{S}_0^r, \mathbf{v}_{r-1}^{UCB}, q_{r-1}^{UCB}(m_r)) - U(\mathbf{S}_0^r, \mathbf{v}, q(m_r)))1(H_{r-1})|\mathcal{F}_{r-1}]] \\ & \leq C_1 \sqrt{\log T} \sum_{r=1}^T E_\pi \left[ \sum_{i=1}^N \sum_{k=1}^{m_r} 1(i \in \mathbf{S}_0^r(k)) \sqrt{\frac{1}{T_i(r-1)}} \right] \\ & \quad + C_1 \sqrt{\log T} \sum_{r=1}^T E_\pi \left[ \sum_{k=1}^{m_r} 1(\rho_r^k \in \varepsilon_{m_r}) \sqrt{\frac{1}{n_{m_r}(\rho_r^k - 1)}} \right] \\ & \leq C_2 \sqrt{\log T} \sum_{i=1}^N E_\pi[\sqrt{T_i(T)}] + C_2 M \sqrt{\log T} \sum_{m=1}^M \sum_{t=1}^T E_\pi \left[ 1(t \in \varepsilon_m) \sqrt{\frac{1}{n_m(t-1)}} \right]. \end{aligned}$$

If  $t \in \varepsilon_m$ , then the user has at least probability  $1 - v_{max}$  to reject the message, in which case the user has the choice to abandon the system. Therefore, if  $t \in \varepsilon_m$ ,  $n_m(t+1) = n_m(t) + 1$  with

probability at least  $1 - v_{max}$ . It implies that for any  $m = 1 \cdots M$ ,

$$\sum_{t=1}^T E_\pi \left[ 1(t \in \varepsilon_m) \sqrt{\frac{1}{n_m(t-1)}} \right] \leq \frac{1}{1 - v_{max}} E_\pi[\sqrt{n_m(T)}] \leq C_3 E_\pi[\sqrt{n_m(T)}].$$

Since  $\sum_{m=1}^M n_m(T) \leq TM$  with probability 1, we have

$$\sum_{m=1}^M E_\pi[\sqrt{n_m(T)}] \leq M\sqrt{T}.$$

Since  $\sum_{i=1}^N T_i(T) \leq \min(M, N)T$  with probability 1, we have

$$\sum_{i=1}^N E_\pi[\sqrt{T_i(T)}] \leq \sqrt{N \min(M, N)T}.$$

Thus, we get the inequality that

$$\begin{aligned} & \sum_{r=1}^T E_\pi \left[ E[(U(\mathbf{S}_0^r, \mathbf{v}_{r-1}^{UCB}, q_{r-1}^{UCB}(m_r)) - U(\mathbf{S}_0^r, \mathbf{v}, q(m_r)))1(H_{r-1}) | \mathcal{F}_{r-1}] \right] \\ & \leq C_2 N \sqrt{T \log T} + C_3 M^2 \sqrt{T \log T}. \end{aligned}$$

Applying Lemma 3.1, we have

$$\begin{aligned} \sum_{r=1}^T E_\pi[1(H_r^c)] & \leq \sum_{r=1}^T \sum_{i=1}^N E_\pi[1(B_{i,r}^c)] + \sum_{r=1}^T \sum_{m=1}^M E_\pi[1(E_{m,r}^c)] \\ & \leq N \sum_{t=1}^T \frac{2}{t^4} + M \sum_{t=1}^T \frac{2}{t^4} \leq C_4(N + M). \end{aligned}$$

For Equation (1), now we bound the difference between  $E_\pi[U(\mathbf{S}^*, \mathbf{v}, q(m_r))]$  and  $E_\pi[U(\mathbf{S}^r, \mathbf{v}, q(m_r))]$ . Note that  $\mathbf{S}^r$  is an adapted sequence, which can be different from  $\mathbf{S}_0^r$ , so we use coupling to bound the difference. We couple the recommending process of  $\mathbf{S}^*$  (call this to user 1) and  $\mathbf{S}^r$  (call this to user 2) when the total number of messages is  $m_r$ . For the  $k^{th}$  recommending message at time  $t$  to user  $r$ , set  $a_1 = \min\{v_k, v_{e_{t,k}^r, t}\}$  and  $a_2 = \max\{v_k, v_{e_{t,k}^r, t}\}$ . Generate two independent uniform random variables  $w_1 \sim \text{unif}[0, 1]$  and  $w_2 \sim \text{unif}[0, 1]$ . The event  $w_1 < a_1$  denotes that both click on the  $k^{th}$  message. If  $w_1 \geq a_2$ , both do not choose the  $k^{th}$  recommending message. When  $v_{e_{t,k}^r, t} < v_k$ ,  $a_1 \leq w_2 < a_2$  means that the  $k^{th}$  message is chosen in  $\mathbf{S}^*$  but not in  $\mathbf{S}^r$ , and vice versa. Either case means that the coupling process breaks. If  $w_2 \geq q(m_r)$ , then both exit the system. Otherwise, they will both get the next message unless the whole sequence has run out. Define the stopping time  $\tilde{\tau}_r$  as the time that the coupling breaks for user  $r$ , i.e., the recommendation in  $\mathbf{S}^*$  with parameters  $\mathbf{v}$  and  $q(m_r)$  is a success but that in  $\mathbf{S}^r$  with parameters  $\mathbf{v}$  and  $q(m_r)$  is a failure. Then we have

$$E_\pi[U(\mathbf{S}^*, \mathbf{v}, q(m_r))] - E_\pi[U(\mathbf{S}^r, \mathbf{v}, q(m_r))] \leq E_\pi \left[ \sum_{k=1}^{m_r} 1(\tilde{\tau}_r = k) \right].$$

Now we consider another recommending process  $\mathbf{S}^r$  with message value  $v_{e_{t,k,t}^{UCB}}^{UCB}$  where  $t = \rho_r^k$  for  $k = 1, \dots, m_r$ . Use the same process to couple  $\mathbf{S}^r$  with parameter  $v_{e_{t,k,t}^{UCB}}^{UCB}$  and  $\mathbf{v}$ . Define  $\tau_r'$  as the stopping time. On the event that  $\mathbf{v}_{\rho_r^k}^{UCB} \geq \mathbf{v}$  for  $k = 1, \dots, m_l$  and  $\mathbf{q}_{\rho_r^k}^{UCB} \geq \mathbf{q}$ , we have

$$E \left[ \sum_{k=1}^{m_r} 1(\tilde{\tau}_r = k) \right] \leq E \left[ \sum_{k=1}^{m_r} 1(\tau_r' = k) \right].$$

Recall that  $J_t = \bigcap_{i \in X} B_{i,t}$ . We therefore have

$$\begin{aligned} & E_\pi \left[ E \left[ \left( U(\mathbf{S}^*, \mathbf{v}, q(m_r), \cdot) - U(\mathbf{S}^r, \mathbf{v}, q(m_r)) \right) \prod_{k=1}^{m_r} 1(J_{\rho_r^k-1}) \middle| \mathcal{F}_{r-1} \right] \right] \\ & \leq E_\pi \left[ \sum_{k=1}^{m_r} 1(\tau_r' = k) 1(J_{\rho_r^k-1}) \middle| \mathcal{F}_{r-1} \right] \\ & = E_\pi \left[ \sum_{k=1}^{m_r} \sum_{i=1}^N 1(i \in S_k^r) \left( v_{i, \rho_r^k-1}^{UCB} - v_i \right) 1(J_{\rho_r^k-1}) \right] \\ & \leq E_\pi \left[ \sum_{k=1}^{m_r} \sum_{i=1}^N 1(i \in S_k^r) \sqrt{8 \frac{\log(\rho_r^k - 1)}{T_i(\rho_r^k - 1)}} \right]. \end{aligned}$$

Define  $z_{i,t}$  as the total number of times that message  $i$  is sent to users at time  $t$ . If none of item  $i$  is recommended at time  $t$ ,  $z_{i,t} = 0$ . Define  $A_i(t)$  as the set of time of recommending  $i$  before time  $t$ . Summing over all users, we have

$$\begin{aligned} & \sum_{r=1}^T E_\pi [U(\mathbf{S}^*, \mathbf{v}, q(m_r)) - U(\mathbf{S}^r, \mathbf{v}, q(m_r))] \\ & \leq E_\pi \left[ \sum_{t=1}^T \sum_{i=1}^N z_{i,t} \sqrt{8 \frac{\log t}{T_i(t-1)}} \right] + \sum_{r=1}^T E_\pi \left[ \sum_{k=1}^{m_r} 1(J_{\rho_r^k-1}^c) \right] \\ & \leq C_5 \sqrt{\log T} \sum_{i=1}^N E_\pi \left[ \sum_{t=1}^T z_{i,t} \sqrt{\frac{1}{T_i(t-1)}} \right] + D E_\pi \left[ \sum_{t=1}^T 1(J_t^c) \right], \end{aligned}$$

where  $D$  is the duration of the recommending horizon and  $C$  is some constant. The last inequality  $\sum_{r=1}^T E_\pi \left[ \sum_{k=1}^{m_r} 1(J_{\rho_r^k-1}^c) \right] \leq D E_\pi \left[ \sum_{t=1}^T 1(J_t^c) \right]$  holds because the total recommending duration is at most  $D$ , which implies that for any  $r$  and  $k$ ,  $\rho_r^k \leq r + D$ . Because of the delayed feedback, user response will be received after at most  $\tau_{max}$  time periods. Recall that  $\tau$  is the delayed time, so we have

$$T_i(t) \geq \sum_{s \in A_i(t)} \sum_{j=1}^{z_{i,s}} 1(\tau \leq (t-s)).$$

Since we assume  $\tau$  has finite support and the maximum possible value is  $\tau_{max}$ , an obvious bound would be

$$T_i(t) \geq \sum_{s \in A_i(t-\tau_{max})} z_{i,s}.$$

We thus have for each  $i \in X$ ,

$$\begin{aligned}
E_\pi \left[ \sum_{t=1}^T z_{i,t} \sqrt{\frac{1}{T_i(t-1)}} \right] &\leq E_\pi \left[ \sum_{t=1}^{\tau_{max}} z_{i,t} \right] + E_\pi \left[ \sum_{t=\tau_{max}+1}^T z_{i,t} \sqrt{\frac{1}{\sum_{s=1}^{t-\tau_{max}} z_{i,s}}} \right] \\
&\leq E_\pi \left[ \sum_{t=1}^{\tau_{max}} z_{i,t} \right] + E_\pi \left[ \sum_{t=\tau_{max}+1}^T \sum_{k=1}^{z_{i,t}} \sqrt{\frac{1}{\sum_{s=1}^{t-\tau_{max}} z_{i,s}}} \right] \\
&\leq E_\pi \left[ \sum_{t=1}^{\tau_{max}} z_{i,t} \right] + E_\pi \left[ \sum_{t=\tau_{max}+1}^T \sum_{k=1}^{z_{i,t}} \sqrt{\frac{1}{\sum_{s=1}^{t-\tau_{max}} z_{i,s}}} - \sum_{t=\tau_{max}+1}^T \sum_{k=1}^{z_{i,t}} \sqrt{\frac{1}{\sum_{s=1}^{t-1} z_{i,s} + k}} \right] \\
&\quad + \sum_{t=\tau_{max}+1}^T \sum_{k=1}^{z_{i,t}} \sqrt{\frac{1}{\sum_{s=1}^{t-1} z_{i,s} + k}} \\
&\leq E_\pi \left[ \sum_{t=1}^{\tau_{max}} z_{i,t} \right] + E_\pi \left[ \sum_{t=\tau_{max}+1}^T \sum_{k=1}^{z_{i,t}} \sqrt{\frac{1}{\sum_{s=1}^{t-\tau_{max}} z_{i,s}}} - \sqrt{\frac{1}{\sum_{s=1}^{t-1} z_{i,s} + k}} \right] \\
&\quad + E_\pi \left[ \sum_{t=\tau_{max}+1}^T \sum_{k=1}^{z_{i,t}} \sqrt{\frac{1}{\sum_{s=1}^{t-1} z_{i,s} + k}} \right] \\
&\leq E_\pi \left[ \sum_{t=1}^{\tau_{max}} z_{i,t} \right] + E_\pi \left[ \sum_{t=\tau_{max}+1}^T \sum_{k=1}^{z_{i,t}} \frac{\sum_{s=t-\tau_{max}+1}^{t-1} z_{i,s} + k}{2(\sum_{s=1}^{t-\tau_{max}} z_{i,s})^{3/2}} \right] \\
&\quad + E_\pi \left[ \sum_{t=\tau_{max}+1}^T \sum_{k=1}^{z_{i,t}} \sqrt{\frac{1}{\sum_{s=1}^{t-1} z_{i,s} + k}} \right].
\end{aligned}$$

Since re-targeting duration is at most  $D$ , all users arriving before  $t - D$  does not receive any further messages. It implies that  $z_{i,t} \leq D$ . Thus,

$$\begin{aligned}
E_\pi \left[ \sum_{t=1}^{\tau_{max}} z_{i,t} \right] + E_\pi \left[ \sum_{t=\tau_{max}+1}^T \sum_{k=1}^{z_{i,t}} \frac{\sum_{s=t-\tau_{max}+1}^{t-1} z_{i,s} + k}{2(\sum_{s=1}^{t-\tau_{max}} z_{i,s})^{3/2}} \right] \\
\leq D\tau_{max} + C_6 D^2 \tau_{max} + D \leq C_7 \tau_{max}.
\end{aligned}$$

We further have

$$E_\pi \left[ \sum_{t=\tau_{max}+1}^T \sum_{k=1}^{z_{i,t}} \sqrt{\frac{1}{\sum_{s=1}^{t-1} z_{i,s} + k}} \right] \leq C_8 E_\pi[\sqrt{T_i(T)}] \leq C_8 \sqrt{T},$$

where  $T_i(T)$  denotes the number of message  $i$  offerings before time  $T$ . Applying Lemma 3.1, we have

$$E_\pi \left[ \sum_{t=1}^T 1(J_t^c) \right] \leq \sum_{i \in X} E_\pi \left[ \sum_{t=1}^T 1(B_{i,t}^c) \right] \leq N \sum_{t=1}^T \frac{2}{t^4} \leq C_9 N.$$

Combining all the results above, we have

$$\sum_{r=1}^T E_\pi[U(\mathbf{S}^*, \mathbf{v}, q(m^*))] - E_\pi[U(\mathbf{S}^r, \mathbf{v}, q(m_r))]$$

$$\begin{aligned}
&\leq \sum_{r=1}^T E_{\pi}[(U(\mathbf{S}^*, \mathbf{v}, q(m^*)) - U(\mathbf{S}^r, \mathbf{v}, q(m_r)))1(H_r)] + \sum_{r=1}^T E_{\pi}[1(H_r^c)] \\
&\leq C(N + M^2)\sqrt{T \log T} + C' N \tau_{max}.
\end{aligned}$$

□

## References

- [1] Remco Van Der Hofstad. *Random graphs and complex networks*, volume 1. Cambridge university press, 2016.
